# Supplementary material
Source: publisher site journal article supplement (https://www.dovepress.com/get_supplementary_file.php?f=264410.xlsx)
Supplement: Supplementary file 1 [file get_supplementary_file.php]

## Sheet: Table S1
Table S1 RNA probes used for RNA pull-down assay
Probes	Probe sequences (5′-3′)
Bio-PART1 (sense)	(biotin-)GAUAAGUACUAAAUGCACGCUGCUA
Bio-PART1 (anti-sense)	(biotin-)CUAUUCAUGAUUUACGUGCGACGAU
Bio-NC (sense)	(biotin-)UAGCAGCGGGAACAGUUC
Bio-NC (anti-sense)	(biotin-)AUCGUCGCCCUUGUCAAG

## Sheet: Table S2
A: The amplification curves (left) and melting peaks (right) of miR-503-5p in TSCC cells
B: The amplification curves (left) and melting peaks (right) of U6 in TSCC cells
C: The raw data of miR-503-5p and U6 in CAL-27 cells detected by qRT-PCR
Color	Position	Sample Name	Gene Name	Condition Name	Cq	Cq Mean	Cq Error	Excluded	Sample Type	Sample Type RQ	Gene Type	Condition Type	Replicate Group	Ratio	Ratio Error	Normalized Ratio	Normalized Ratio Error	Scaled Ratio	Scaled Ratio Error	Dye	Edited Call	Failure	Slope	EPF	Notes	Sample Prep Notes	Number
255;242;138;21	D10	Bio-NC-1	U6		14.18	14	0.16	Unchecked	Unknown	Unknown	Target	Unknown	D10	-	-	-	-	-	-	SYBR Green I		No ratio because no reference gene defined	1.31	4.36			46
255;250;215;15	D11	Bio-NC-2	U6		13.91	14	0.16	Unchecked	Unknown	Unknown	Target	Unknown	D10	-	-	-	-	-	-	SYBR Green I		No ratio because no reference gene defined	1.3	4.31			47
255;103;154;47	D12	Bio-NC-3	U6		13.91	14	0.16	Unchecked	Unknown	Unknown	Target	Unknown	D10	-	-	-	-	-	-	SYBR Green I		No ratio because no reference gene defined	1.32	4.31			48
255;95;103;174	E7	Bio-NC-1	miR-503-5P		25	25.01	0.03	Unchecked	Unknown	Unknown	Target	Unknown	E7	-	-	-	-	-	-	SYBR Green I		No ratio because no reference gene defined	1.27	4.25			55
255;205;18;55	E8	Bio-NC-2	miR-503-5P		25.04	25.01	0.03	Unchecked	Unknown	Unknown	Target	Unknown	E7	-	-	-	-	-	-	SYBR Green I		No ratio because no reference gene defined	1.27	4.24			56
255;34;176;146	E9	Bio-NC-3	miR-503-5P		24.98	25.01	0.03	Unchecked	Unknown	Unknown	Target	Unknown	E7	-	-	-	-	-	-	SYBR Green I		No ratio because no reference gene defined	1.24	4.18			57
255;132;197;238	F10	Bio-PART1-1	U6		16.4	16.4	0.14	Unchecked	Unknown	Unknown	Target	Unknown	F10	-	-	-	-	-	-	SYBR Green I		No ratio because no reference gene defined	1.29	4.37			70
255;103;103;103	F11	Bio-PART1-2	U6		16.27	16.4	0.14	Unchecked	Unknown	Unknown	Target	Unknown	F10	-	-	-	-	-	-	SYBR Green I		No ratio because no reference gene defined	1.38	4.45			71
255;242;138;21	F12	Bio-PART1-3	U6		16.54	16.4	0.14	Unchecked	Unknown	Unknown	Target	Unknown	F10	-	-	-	-	-	-	SYBR Green I		No ratio because no reference gene defined	1.39	4.53			72
255;103;154;47	G7	Bio-PART1-1	miR-503-5P		23.04	23.1	0.06	Unchecked	Unknown	Unknown	Target	Unknown	G7	-	-	-	-	-	-	SYBR Green I		No ratio because no reference gene defined	1.36	4.38			79
255;180;73;149	G8	Bio-PART1-2	miR-503-5P		23.16	23.1	0.06	Unchecked	Unknown	Unknown	Target	Unknown	G7	-	-	-	-	-	-	SYBR Green I		No ratio because no reference gene defined	1.43	4.46			80
255;95;103;174	G9	Bio-PART1-3	miR-503-5P		23.09	23.1	0.06	Unchecked	Unknown	Unknown	Target	Unknown	G7	-	-	-	-	-	-	SYBR Green I		No ratio because no reference gene defined	1.22	4.13			81
D: The raw data of miR-503-5p and U6 in SCC-9 cells detected by qRT-PCR
Color	Position	Sample Name	Gene Name	Condition Name	Cq	Cq Mean	Cq Error	Excluded	Sample Type	Sample Type RQ	Gene Type	Condition Type	Replicate Group	Ratio	Ratio Error	Normalized Ratio	Normalized Ratio Error	Scaled Ratio	Scaled Ratio Error	Dye	Edited Call	Failure	Slope	EPF	Notes	Sample Prep Notes	Number
255;242;138;21	A7	Bio-NC-1	miR-503-5P		24.17	24.53	0.53	Unchecked	Unknown	Unknown	Target	Unknown	A7	-	-	-	-	-	-	SYBR Green I		No ratio because no reference gene defined	1.1	3.93			7
255;250;215;15	A8	Bio-NC-2	miR-503-5P		24.11	24.53	0.53	Unchecked	Unknown	Unknown	Target	Unknown	A7	-	-	-	-	-	-	SYBR Green I		No ratio because no reference gene defined	1.07	3.87			8
255;103;154;47	A9	Bio-NC-3	miR-503-5P		23.87	24.53	0.53	Unchecked	Unknown	Unknown	Target	Unknown	A7	-	-	-	-	-	-	SYBR Green I		No ratio because no reference gene defined	0.86	3.3			9
255;103;154;47	C4	Bio-PART1-1	U6		17	16.82	0.48	Unchecked	Unknown	Unknown	Target	Unknown	C4	-	-	-	-	-	-	SYBR Green I		No ratio because no reference gene defined	1.35	4.38			28
255;180;73;149	C5	Bio-PART1-2	U6		17.22	16.82	0.48	Unchecked	Unknown	Unknown	Target	Unknown	C4	-	-	-	-	-	-	SYBR Green I		No ratio because no reference gene defined	1.28	4.27			29
255;95;103;174	C6	Bio-PART1-3	U6		17.47	16.82	0.48	Unchecked	Unknown	Unknown	Target	Unknown	C4	-	-	-	-	-	-	SYBR Green I		No ratio because no reference gene defined	1.42	4.52			30
255;103;103;103	C7	Bio-PART1-1	miR-503-5P		22.49	22.76	0.38	Unchecked	Unknown	Unknown	Target	Unknown	C7	-	-	-	-	-	-	SYBR Green I		No ratio because no reference gene defined	1.05	3.82			31
255;242;138;21	C8	Bio-PART1-2	miR-503-5P		22.27	22.76	0.38	Unchecked	Unknown	Unknown	Target	Unknown	C7	-	-	-	-	-	-	SYBR Green I		No ratio because no reference gene defined	1.09	3.84			32
255;250;215;15	C9	Bio-PART1-3	miR-503-5P		22.52	22.76	0.38	Unchecked	Unknown	Unknown	Target	Unknown	C7	-	-	-	-	-	-	SYBR Green I		No ratio because no reference gene defined	1.06	3.83			33
255;95;103;174	H10	Bio-NC-1	U6		14.24	14.05	0.14	Unchecked	Unknown	Unknown	Target	Unknown	D10	-	-	-	-	-	-	SYBR Green I		No ratio because no reference gene defined	1.39	4.51			94
255;205;18;55	H11	Bio-NC-2	U6		14.09	14.05	0.14	Unchecked	Unknown	Unknown	Target	Unknown	D10	-	-	-	-	-	-	SYBR Green I		No ratio because no reference gene defined	1.27	4.26			95
255;34;176;146	H12	Bio-NC-3	U6		13.96	14.05	0.14	Unchecked	Unknown	Unknown	Target	Unknown	D10	-	-	-	-	-	-	SYBR Green I		No ratio because no reference gene defined	1.29	4.28			96
